# Supplementary material for: Comparison of hyper-cross-linked polystyrene/polyacryldiethylenetriamine (HCP/PADETA) interpenetrating polymer networks (IPNs) with hyper-cross-linked polystyrene (HCP): structure, adsorption and separation properties
Source: Royal Society of Chemistry journal article supplement (doi:10.1039/c6ra01932c), 2016-01-01

## Electronic Supplementary Information

**Comparison of hyper-cross-linked polystyrene/polyacryldiethylenetriamine (HCP/PADETA) interpenetrating polymer networks (IPNs) with hyper-cross-linked polystyrene (HCP): Structure, adsorption and separation properties**

Zhenyu Fu, Shan Han, Jianhan Huang\*, You-Nian Liu\*

*College of Chemistry and Chemical Engineering, Central South University, Changsha, Hunan 410083, China*

---

\* Corresponding Authors. Tel./fax: +86-731-88879616. E-mail: [jianhanhuang@csu.edu.cn](mailto:jianhanhuang@csu.edu.cn) (Jianhan Huang); [liuyounian@csu.edu.cn](mailto:liuyounian@csu.edu.cn) (You-Nian Liu).

Table S1 Correlated parameters for the equilibrium data of salicylic acid adsorption on HCP/PADETA IPNs.

|       | Langmuir model |              |        | Freundlich model           |       |        |
|-------|----------------|--------------|--------|----------------------------|-------|--------|
|       | $K_L/(L/mg)$   | $q_m/(mg/g)$ | $R^2$  | $K_F/((mg/g)(L/mg)^{1/n})$ | $n$   | $R^2$  |
| 298 K | 0.1471         | 373.6        | 0.9861 | 156.3                      | 6.623 | 0.9968 |
| 308 K | 0.0749         | 425.6        | 0.9866 | 139.6                      | 5.315 | 0.9974 |
| 318 K | 0.0654         | 454.8        | 0.9887 | 135.2                      | 4.878 | 0.9985 |

Table S2 Correlative parameters of kinetic adsorption data of salicylic acid on HCP and HCP/PADETA IPNs from aqueous solution according to the pseudo-first-order and pseudo-second-order rate equations.

| Adsorbent       | T (K) | C <sub>0</sub> (mg/L) | Pseudo-first-order rate equation          |                             |                | Pseudo-second-order rate equation |                             |                |
|-----------------|-------|-----------------------|-------------------------------------------|-----------------------------|----------------|-----------------------------------|-----------------------------|----------------|
|                 |       |                       | <i>k<sub>1</sub></i> (min <sup>-1</sup> ) | <i>q<sub>e</sub></i> (mg/g) | R <sup>2</sup> | <i>k<sub>2</sub></i> (g/(mg·min)) | <i>q<sub>e</sub></i> (mg/g) | R <sup>2</sup> |
| HCP             | 293   | 604.3                 | 0.0299                                    | 116.8                       | 0.9678         | 0.00031                           | 130.8                       | 0.9926         |
| HCP/PADETA IPNs | 293   | 604.3                 | 0.1342                                    | 142.3                       | 0.9899         | 0.00129                           | 155.0                       | 0.9961         |
|                 | 303   | 604.3                 | 0.1525                                    | 149.9                       | 0.9831         | 0.00137                           | 163.9                       | 0.9975         |
|                 | 313   | 604.3                 | 0.1970                                    | 151.0                       | 0.9928         | 0.00184                           | 163.6                       | 0.9943         |
|                 | 313   | 804.3                 | 0.1122                                    | 182.7                       | 0.9810         | 0.00080                           | 201.1                       | 0.9988         |
|                 | 313   | 1003.8                | 0.0785                                    | 209.7                       | 0.9835         | 0.00048                           | 232.5                       | 0.9941         |

Fig. S1 SEM images of (a) CMPS, (b) CMPS/PMA IPNs, (c) HCP/PMA IPNs and (d) HCP/PADETA IPNs, respectively.

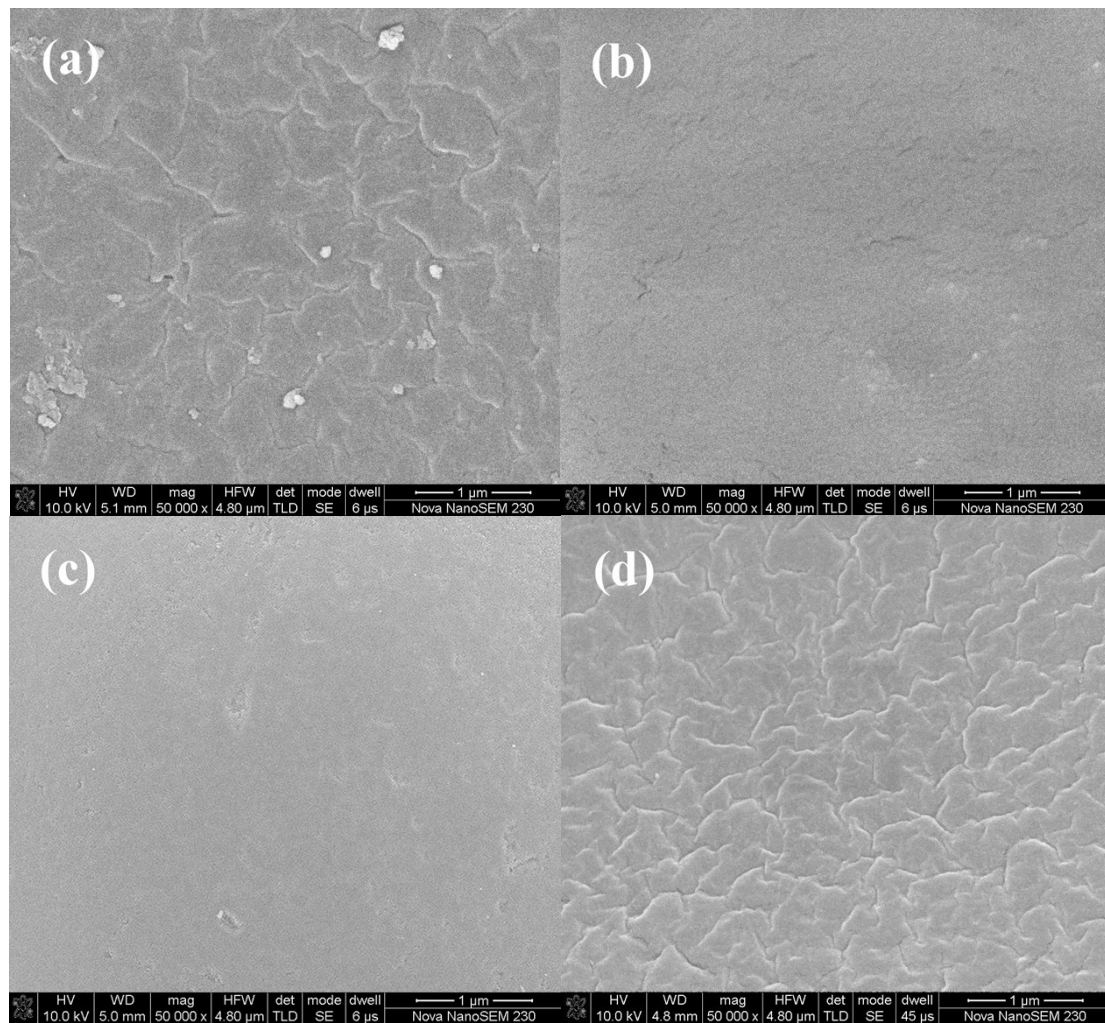

Fig. S2 Equilibrium isotherms of salicylic acid on HCP/PADETA IPNs from aqueous solution with the temperature at 298, 308 and 318 K, respectively.

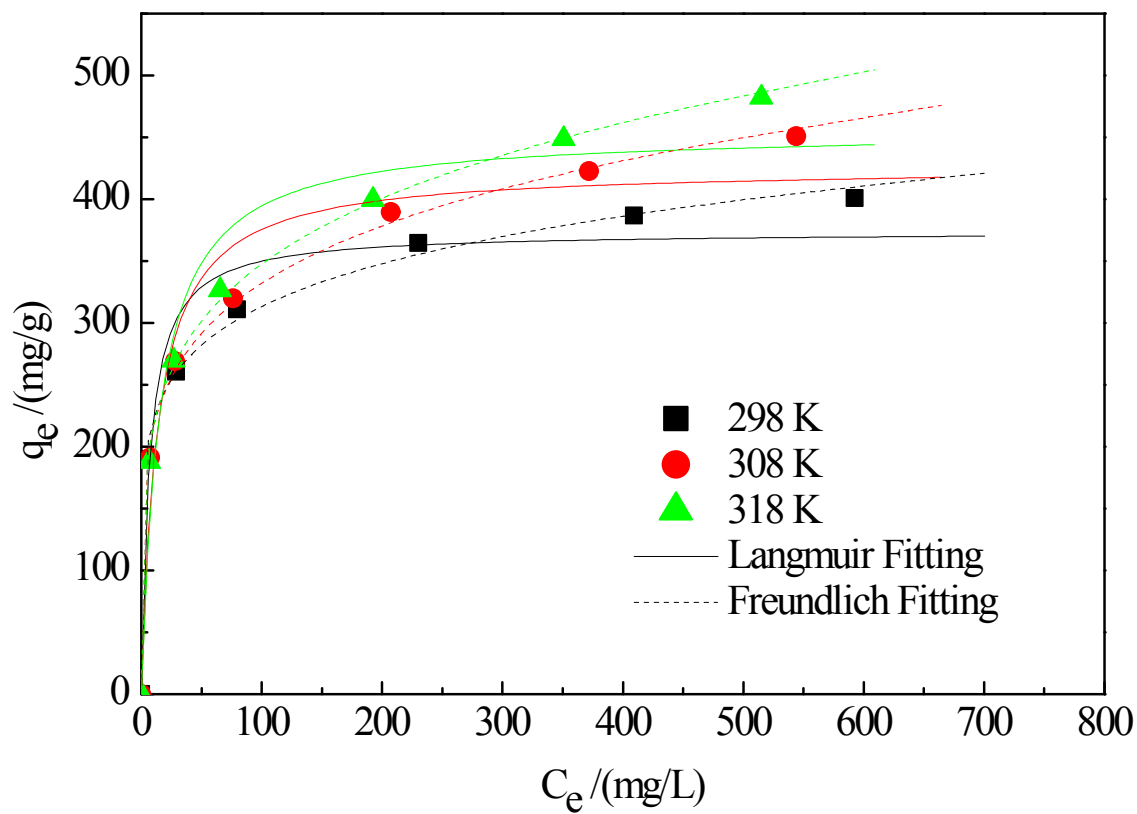

Fig. S3 Correlative parameters of kinetic adsorption data of salicylic acid on HCP and HCP/PADETA IPNs from aqueous solution (The pseudo-first-order and pseudo-second-order rate equations are been applied for the simulation of the experimental kinetic data).

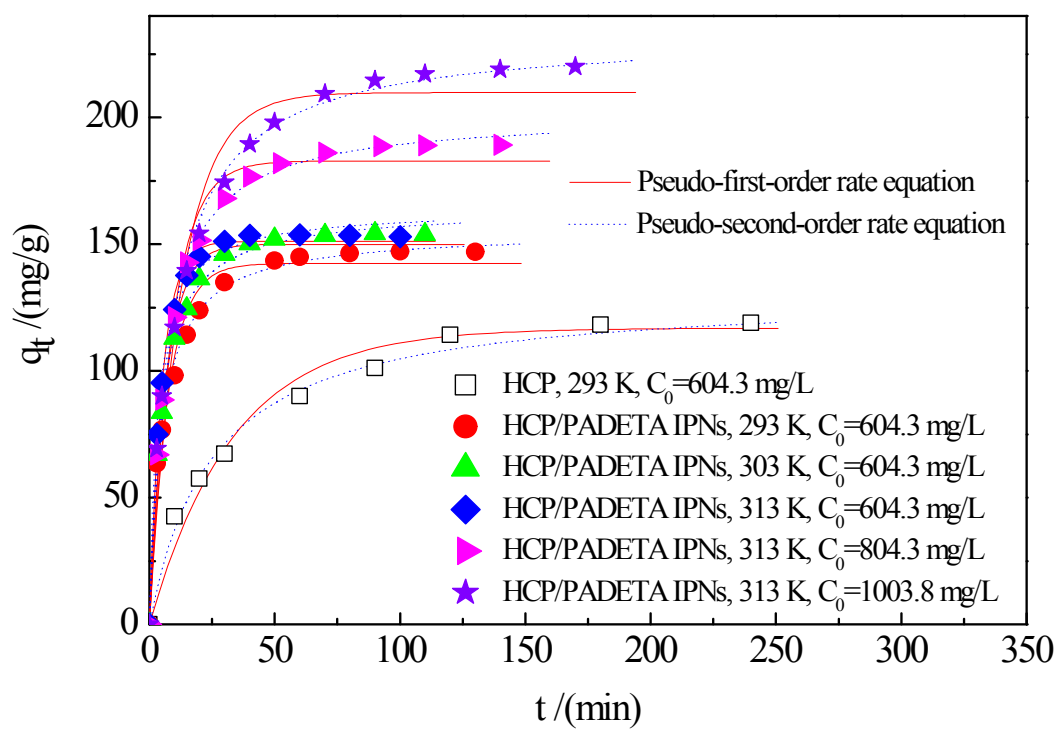

Fig. S4 Desorption efficiency of salicylic acid from the resin column by different desorption solvents;

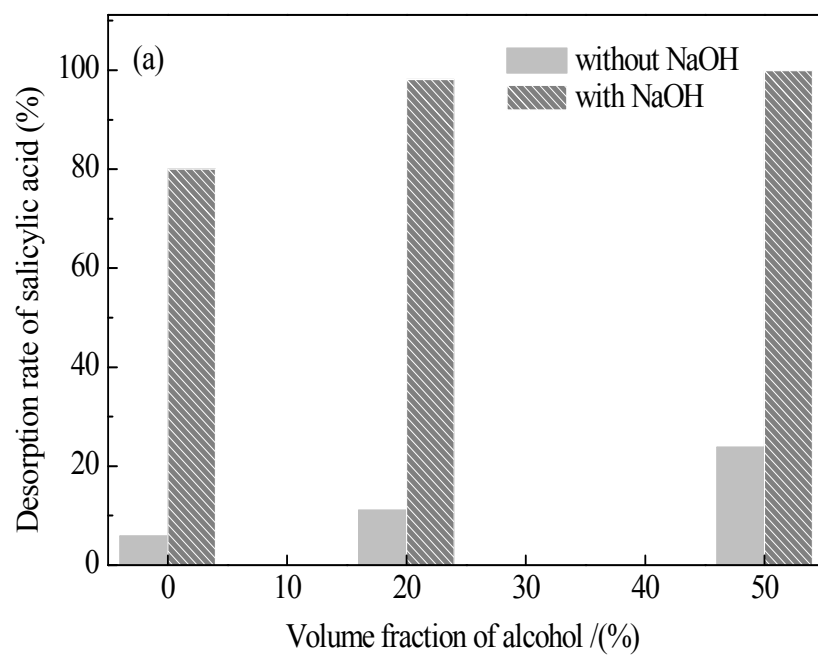

Fig. S5 Adsorption-desorption capacity of HCP/PADETA IPNs using a mixed solution of 0.01 mol/L of NaOH (w/v) and 20% of ethanol (v/v) as the desorption process for five cycles.

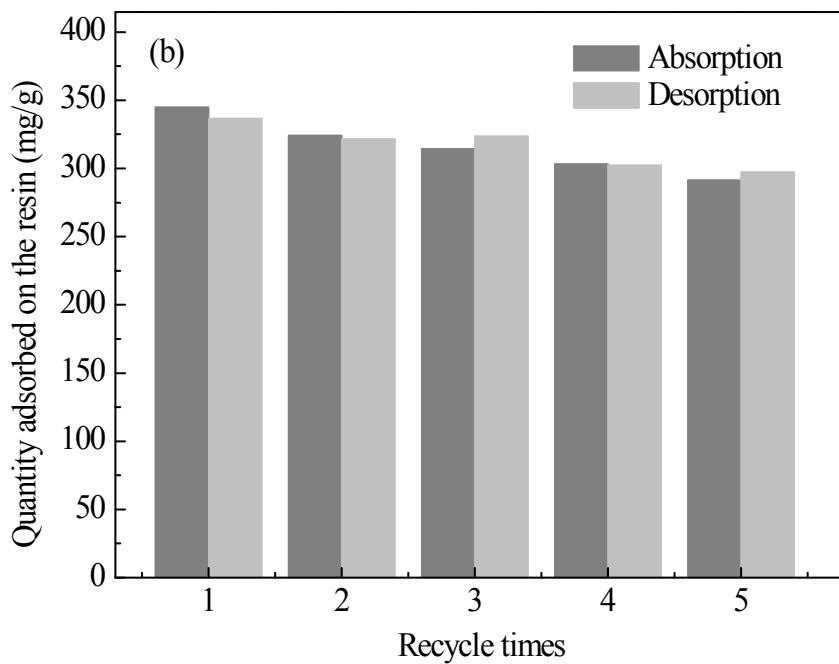

Supplement: c6ra01932c1.pdf [file c6ra01932c1.pdf]
